1 Improving HIV Outcomes in Miami's Black populations with clinic-based community health  
2 workers protocol: The integrated navigation and support for treatment adherence, counseling,  
3 and research (INSTACARE) randomized controlled trial

4

5

6 Sonjia Kenya <sup>1,2</sup>¶ <sup>##a</sup>, BreAnne Young<sup>1&#a</sup>, Sebastian Escarfuller <sup>3&</sup>, Deborah Jones-Weiss <sup>3&</sup>,  
7 Olveen Carrasquillo <sup>1,2&</sup>, Ana Riccio <sup>1&</sup>, Pan Yue <sup>4&</sup>

8

9

10

11 <sup>1</sup>Department of General Internal Medicine, University of Miami Miller School of Medicine, Miami,  
12 FL, USA

13

14 <sup>2</sup>Department of Public Health Sciences, University of Miami Miller School of Medicine, Miami,  
15 FL, USA

16

17 <sup>3</sup>Department of Psychiatry & Behavioral Sciences, University of Miami Miller School of  
18 Medicine, Miami, FL, USA

19

20 <sup>4</sup>Department of Public Health Sciences Biostatistics, University of Miami Miller School of  
21 Medicine, Miami, FL, USA

22

23 \*Corresponding author

24 Email: [skenya@med.miami.edu](mailto:skenya@med.miami.edu) (SK)

25 ¶ These authors contributed equally to this work.

26 & These authors contributed equally to this work.

27 ABSTRACT: Miami-Dade is an HIV epicenter where Black populations experience excess  
28 AIDS-related deaths due to poor medication adherence, which prevents achieving an  
29 undetectable HIV viral load (VL). A promising approach to improving HIV outcomes in Black  
30 populations has been the use of community health workers (CHWs). Evidence shows CHWs  
31 trained in motivational interviewing (MI) may further improve outcomes, however little data  
32 exists about Black CHWs trained in MI who support Black patients with HIV. While CHWs  
33 traditionally help address social determinants of health in nonclinical locations, there is less  
34 information on CHWs who provide support in clinical settings, which may result in even greater  
35 improvements in HIV outcomes. To examine effects of CHWs trained in MI who provide HIV  
36 care in both clinic and community settings, a randomized controlled trial (RCT) is being  
37 conducted in Miami-Dade's largest public hospital. The Integrated Navigation and Support for  
38 Treatment, Adherence, Counseling, and Research intervention is a RCT of 300 Black adults  
39 with an unmanaged HIV VL (> 200 copies/mL). CHWs trained in MI are embedded into HIV  
40 clinical care teams and participate in hospital rounds with clinicians treating inpatients.  
41 Participants randomized into the CHW intervention arm receive 12 months of CHW-led health  
42 education and assistance with health care navigation and social services. The primary outcome  
43 is change in HIV viral load suppression at 12 months. Secondary outcomes include changes in  
44 medication adherence and social determinants of health. Study enrollment began in 2023 and  
45 will be completed by 2027. The first results are expected to be submitted for publication in 2025.  
46 INSTACARE is one of the first RCTs to examine effects of clinic-based support provided by  
47 CHWs trained in MI on Black populations with an unmanaged VL and will provide evidence on  
48 the impact of such strategies on medication adherence and social determinants of health.

## 49 **INTRODUCTION**

50 Miami-Dade is an HIV epicenter where Black adults account for 15% of the County's population  
51 and 64% of AIDS-related deaths [1,2]. Despite availability of proven HIV treatment and prevention  
52 resources, the HIV incidence rate in Miami persists as one of the highest in the nation and the

53 region's Black communities experience some of the greatest HIV disparities [3,4]. Locally, 1 in  
54 every 38 Black adults has been diagnosed with HIV compared to 1 in 136 White adults and 1 in  
55 129 Latin adults [1]. Optimal HIV health is indicated by viral load (VL) suppression, achieved only  
56 through antiretroviral therapy (ART) adherence and care continuity. Coordination of health care  
57 delivery among various providers, VL monitoring, and adherence to non-HIV medications among  
58 those with comorbidities, make HIV a difficult chronic disease to manage. Disproportionately poor  
59 social determinants of health (SDOH) in Miami's Black communities further compound these  
60 challenges. For these reasons, Black people living with HIV (BPH) in Miami suffer the County's  
61 lowest rates of care engagement, retention, and viral load suppression.

62

63 The causes for this lack of engagement in HIV care are complex and influenced by a multilevel  
64 interaction of disease, behavior, and SDOH, including poverty, homelessness, unemployment,  
65 and stigma [5-8]. Miami's Black population accounts for nearly half of the poor, over 40% of the  
66 homeless, and excess unemployment (15%) that nearly triples that of whites [9,10]. HIV stigma  
67 further exasperates these challenges, increases the risk for ART non-adherence, and  
68 contributes to BPH falling out of care [11-13].

69

70 To date, one of the most promising interventions to improve care continuity among BPH  
71 involves using community health worker (CHW) strategies [14-16]. CHWs are culturally-  
72 congruent lay health workers who serve as an interface between the community and the health  
73 care system in highly vulnerable populations [17-19]. They provide health education in culturally  
74 and linguistically appropriate ways, help patients access effective health care by functioning as  
75 patient navigators, and assist with nonmedical barriers such as social issues [20-22]. Our work,  
76 along with many others', has shown CHWs effectively address SDOH, leading to improved care  
77 engagement, HIV outcomes, and viral suppression among BPH [14-16].

78

79 Additionally, research suggests CHW interventions could benefit further from the use of theory-  
80 driven intervention strategies, such as Motivational Interviewing (MI), especially when working  
81 with Black populations. While MI has traditionally been used by health practitioners to influence  
82 behavior change among their patient populations, in recent years, it is increasingly employed by  
83 CHWs working with vulnerable populations, however less information is available about the  
84 impact of CHW-led MI among Black populations with poorly controlled HIV [23]. As members of  
85 the community, CHWs are able to successfully use MI to explore and evoke change talk that  
86 elicits a patient's intrinsic desire, ability, and reasons to make a behavioral change [23].

87  
88 CHWs traditionally provide patient support in nonclinical locations, including homes, recreation  
89 centers, or local parks [20,21]. Although a wide body of research demonstrates the clinical value  
90 of community-based CHW support addressing SDOH and HIV outcomes, less research exists  
91 on the impact of CHWs who also provide support in clinical settings, which may result in even  
92 greater improvements in HIV outcomes.

93  
94 To examine the impact of CHWs who provide HIV care in both clinic and community settings,  
95 this research team developed the **Integrated Navigation and Support for Treatment,**  
96 **Adherence, Counseling, and Research (INSTACARE) intervention** to address the SDOH  
97 underlying poor HIV outcomes among BPH in Miami, FL.

## 98 **METHODS**

### 99 **Preliminary Research**

100 INSTACARE builds upon the findings of a formative pilot study [24,25] which aimed to 1) better  
101 understand how clinic-based CHWs embedded in South Florida's largest safety-net hospital  
102 could contribute to improved HIV outcomes in BPH, and 2) the feasibility of this approach. This  
103 preliminary research was conducted in two parts. Phase 1 involved interviews with patients,  
104 caregivers, and clinic staff to assess perceptions on the barriers and facilitators to HIV care [24].

105 Results suggested integrating CHWs into HIV clinical teams could be an efficacious approach to  
106 overcome systemic barriers to HIV care and address unmet social needs that are beyond a  
107 physicians' purview. Using this feedback, Phase 2 included the development and  
108 implementation of a 3-month clinic-embedded CHW intervention to improve ART adherence  
109 among BPH in Miami-Dade County [25]. Among 10 participants, this study found CHWs were a  
110 practical and feasible enhancement to HIV clinical care teams. Further, CHWs' ability to provide  
111 targeted social and clinical support suggested this model could be a promising strategy to  
112 achieve sustained viral suppression and care engagement for BPH.

113

#### 114 **Conceptual Design**

115 The Integrated Navigation Services for Treatment Adherence, Counseling, and Research  
116 (INSTACARE) study (R01MD08187) is a two-arm 1:1 randomized control trial (RCT) examining  
117 the effects of 12-months of CHW support on HIV viral load (VL) among 300 Black people living  
118 with HIV in South Florida. INSTACARE is grounded in the Social Ecological Model, a  
119 multidimensional theoretical framework that broadly examines how the interactions between  
120 one's social conditions and environment influence health behavior [26]. The focus of this design  
121 emphasizes CHW intervention models as a feasible strategy to address systems level barriers  
122 to care across multiple domains, including individual, interpersonal, organizational, and  
123 community. The study is registered with ClinicalTrials.gov (NCT04663152) and ethical approval  
124 was obtained by the University of Miami Institutional Review Board (IRB #20201234).

125

#### 126 **Study Setting**

127 INSTACARE is based in Miami-Dade County, which has a culturally and ethnically diverse  
128 Black community unlike anywhere else in the Nation. Home to the largest enclave of Black  
129 immigrants in the U.S., one-third of Miami's Black residents are foreign-born, many from

130 Caribbean or South American descent [27]. While composing less than 20% of the County's  
131 residents, this population represents 64% of AIDS-related deaths [28].

132

133 Participants for this study are being recruited from South Florida's largest public health system;  
134 a network of hospitals, specialty centers, urgent care facilities, and community clinics, including  
135 the County's safety-net hospital, Jackson Memorial (JMH) [24]. As the teaching hospital for  
136 University of Miami Miller School of Medicine (UM), JMH and UM share a campus in Downtown  
137 Miami. JMH is staffed by an interdisciplinary treatment team of hospital clinicians, including UM  
138 faculty. In 2022, JMH providers ascertained over 750 of their patients living with HIV had not  
139 achieved viral suppression, the majority of which identified as Black [29]. Participants were  
140 recruited from this patient population, many of whom face significant barriers to care, such as  
141 extreme poverty, homelessness, substance use, mental illness, domestic violence and other  
142 social challenges associated with suboptimal medication adherence.

143

#### 144 **Inclusion and Exclusion Criteria**

145 Eligible participants are Miami-Dade residents aged 18 years or older, who self-identify as Black  
146 or African American, and have unmanaged HIV, as indicated by a VL > 200 copies/mL. Initially,  
147 eligible participants (referred to as clients by the study team) were expected to have a  
148 detectable VL at the time of study enrollment. However, three-months after enrollment began,  
149 the investigators realized that numerous participants referred by HIV clinicians often had  
150 undetectable viral loads during study screening, despite clinical documentation of an extensive  
151 history of unmanaged HIV. This trend prompted investigators to acknowledge that recent  
152 advancements in HIV medications can help PLH achieve viral suppression in as little as one to  
153 three weeks. Thus, eligibility criteria were expanded to capture BPH who have a history of  
154 unmanaged VL. Specifically, participants are eligible for enrollment if they present

155 documentation of an unmanaged VL (> 200 copies per mL) anytime within the six-months prior  
156 to enrollment.

157

## 158 **Recruitment**

159 Recruitment for this five-year study began April 2023. To date, most participants have been  
160 recruited from the HIV treatment clinic within JMH. Prior to enrollment, the CHW team  
161 developed a repertoire with the clinical staff to facilitate easy integration into the clinical care  
162 system. This included an in-service training for the clinical staff conducted by the research team  
163 in March 2023 to provide information on the study aims, target population, and eligibility criteria.  
164 Study brochures were placed in clinic waiting areas, replenished weekly, and distributed to all  
165 clinic healthcare providers and case managers to increase the study's visibility. Providers and  
166 case workers also shared these brochures with potentially eligible patients. Additionally, CHWs  
167 attended weekly in-patient rounds in the Infectious Disease Ward and consulted with the clinical  
168 team case managers to identify potentially eligible participants.

169

## 170 **Consent and Enrollment**

171 In this ongoing study, potential participants are often introduced to a CHW by HIV providers and  
172 case managers during their clinic visits. Patients who express interest are connected to a study  
173 team member who provides a detailed description of the study and verifies the patient's  
174 eligibility criteria, including viral load >200 copies/mL. Qualifying patients are then linked to a  
175 CHW to schedule an intake appointment, at which time informed consent is obtained and the  
176 baseline assessment is administered.

177

178 Informed consent (IFC) and all study data are captured electronically via the University's  
179 electronic data management system, REDCap. Participants are provided a paper copy of the  
180 informed consent for their records and CHWs read through the entire document in the

181 participants preferred language. Study materials, including informed consent forms, are  
182 translated to Spanish and Kreyol for the patient’s comfort. Participants are asked to digitally sign  
183 the IFC; participants unable to sign the digital consent are provided a paper copy to sign for our  
184 records. The baseline assessment is then administered orally, and participant responses are  
185 recorded to REDCap by the CHW. The enrollment process takes approximately 1.5 – 2 hours to  
186 complete and participants are compensated \$125 for their time.

187  
188 Enrollment is frequently conducted at the INSTACARE offices located on the UM-JMH campus  
189 but can also be performed off-campus at a mutually agreed public location. CHWs are  
190 encouraged to use the buddy system, when possible, for field-based enrollment. Staff electronic  
191 devices (including mobile devices and tablets) are equipped with cellular hotspots and unlimited  
192 data to facilitate electronic data collection, and CHWs are trained to identify locations with ample  
193 cell service when feasible. Participants retained throughout the study are compensated \$400 for  
194 their time participating; \$125 at baseline and exit, and \$50 at the 3-, 6-, and 9-month  
195 checkpoints.

196

## 197 **Randomization**

198 Following the IFC and baseline assessment, participants are assigned to the CHW intervention  
199 or usual care (control) group using stratified block randomization. The sample was stratified by  
200 sex (male, female) with a fixed block size of six and a 1:1 randomization allocation. While the  
201 principal investigator and program coordinator are blinded to study allocation, both participants  
202 and CHWs are aware of the group to which each participant is randomized.

203

## 204 **Study Procedures**

205 *Community Health Worker Intervention*

206



207 *CHW Characteristics*

208 CHWs employed during the pilot study were subsequently hired for this intervention as well.  
209 Building upon the pilot framework, additional CHWs hired for this study were culturally  
210 congruent with the population of focus, highly familiar with local Black communities, and had  
211 prior experience in service delivery (e.g., social work, HIV testing, linkage to care support,  
212 education services, etc.) among Black populations. The CHW team is also multilingual, with  
213 multiple members speaking Haitian Creole and Spanish. CHWs are assigned a caseload of 10-  
214 15 intervention clients, depending on the complexity of the client. Complexity refers to the  
215 difficulty of a client's care needs, ranked on a three-point scale from low to high. The complexity  
216 of each case is determined by the CHW and is subject to change throughout their enrollment  
217 period.

218

219 *CHW Training*

220 All CHWs complete HIV pre- and post-counseling coursework through the Miami-Dade Florida  
221 Department of Health [31]. As shown in Table 1, this blended learning series includes two online  
222 courses and an in-person classroom training centered on counseling, testing and linkage to  
223 care. Each online component takes approximately five hours to complete and covers the history,  
224 demographics, and transmission of HIV/AIDS, strategies for counseling on prevention and  
225 treatment, and HIV test administration. The in-person training was a four-hour workshop  
226 providing hands on learning through open discourse and roleplay activities.

227

228 CHWs also receive an introduction to Motivational Interviewing theory and practice tailored  
229 specifically for HIV healthcare workers. The four session series provides a didactic overview of  
230 the MI process and its practice through demonstration practices, guided roleplay, and skills  
231 evaluation by self and MI instructors.

232

233 Additionally, CHWs complete all University of Miami required training modules for human  
234 subjects' research, including coursework through the Collaborative Institutional Training  
235 Initiative (CITI), which covered human subject protections, HIPAA guidelines and policies,  
236 ethical considerations for vulnerable populations, and current regulatory and guidance  
237 information. CHWs also receive ongoing training including continuing education modules on  
238 topics such as motivational interviewing, clinic and insurance navigation, and social support  
239 resource navigation. Weekly meetings are also held with a CHW supervisor to obtain  
240 performance feedback and discuss individual cases.

241

#### 242 *Motivational Interviewing*

243 INSTACARE CHWs are also trained in Motivational Interviewing (MI), a patient-centered  
244 interview technique intended to elicit behavior change by increasing intrinsic motivation [31].  
245 Historically, MI has been used by trained clinicians and counselors to support patients with  
246 substance use and addiction disorders [32,33]. Conversations are held in such a way that the  
247 participant should increase their motivation to make changes based on the values and beliefs  
248 they hold. Immigrant communities struggling with the unfamiliarity of the health-care system,  
249 limited transportation, and fear of deportation, may benefit from MI as the conversations seek to  
250 address potential barriers in depth with the CHW [31]. For example, the depth of the MI  
251 conversation may lead a CHW to support a participant in identifying strategies to minimize  
252 deportation risk, such as by relying on a friend or family member to help with transportation [31].

253

#### 254 *Months 1-3: Individualized Activation*

255 The CHW intervention is divided into 3 phases: activation; commitment; and maintenance  
256 (Table 2). The activation phase takes place during the first three months of the intervention.  
257 Within one week of enrollment, clients are assigned a CHW, and a meeting is scheduled for a  
258 comprehensive, face-to-face evaluation of the client's social and environmental conditions. This

259 evaluation includes include a discussion of (1) the client’s socioeconomic experience, such as  
260 housing and income stability or food availability; (2) potential barriers within their built  
261 environment and access to reliable transportation; (3) the presence of social support systems;  
262 (4) experiences with the criminal justice or immigration systems; and (5) knowledge of the  
263 healthcare system, including ability to communicate with providers, familiarity with their  
264 healthcare coverage, understanding their HIV status and treatment plan, and general system  
265 navigation. CHWs also discuss current lifestyle behaviors, including drugs/alcohol use and  
266 sexual risk behaviors. While INSTACARE is focused on improved VL through increased ART  
267 adherence, CHWs also address these issues from an overall health and general well-being  
268 approach.

269

270 For the first three-months, CHWs engage clients weekly in problem-solving processes to set  
271 priorities for immediate problem resolution. Personal health goals are established for VL control,  
272 such as developing strategies to improve ART adherence, addressing barriers to care, and  
273 resolving ambivalence about HIV treatment. A plan is developed to accomplish those goals and  
274 review results. CHWs also accompany clients to their medical appointments and review  
275 treatment plans to ensure they understand provider recommendations.

276

#### 277 *Months 4-6: Strengthening Commitment to Manage HIV*

278 Months 4-6 focus on practicing new behaviors including building self-efficacy and focusing on  
279 long-term change benefits. Depending on each client’s development, in-person meetings will  
280 gradually be replaced with phone-based support as they improve skills to manage HIV. Clients  
281 also continue to review their personal health goals regarding VL control and revise their plan to  
282 accomplish those goals as needed. By Month-5, contacts outside of clinic appointments or other  
283 support services are largely be made by phone as clients approach the maintenance phase.

284

285 *Months 7-12: Maintenance*

286 After the first six months, participants will enter the Maintenance Phase, aimed at continued  
287 commitment to sustaining behavior change. Clients are contacted two to three times per month  
288 to check on their status. These contacts may also include appointment reminders, facilitating  
289 contact with providers, and rescheduling appointments as needed.

290  
291 Findings from an earlier RCT among this demographic found mean viral load among  
292 participants in both the control and intervention groups began to increase, or “rebound,” after 9  
293 months, suggesting a high-level of CHW activities may be needed to maintain the improvements  
294 achieved during earlier months [34]. Accordingly, the INSTACARE CHW protocol highlights this  
295 increased risk of rebounding. Specifically, CHW training emphasizes the importance of checking  
296 client progress and facilitating additional support services 90 to 120 days before study exit.  
297 Such cases are discussed with the team of investigators to determine the appropriate case-by-  
298 case response, such as modifying service intensity or altering the type of support delivered (i.e.,  
299 review ART adherence strategies or verify client efficacy to maintain and social services,  
300 including food stamps, housing assistance, transportation vouchers, health insurance, and  
301 mental health support). As the 12-month enrollment period nears conclusion, clients should be  
302 near independence and feel comfortable managing their HIV care autonomously. Final CHW  
303 activities may include linking participants to additional community- and clinic-based resources  
304 for ongoing social support beyond their study participation period.

305

306 *Control Group: Enhanced Usual Care (EUC)*

307 Patients randomized to the control arm receive their usual HIV services according to their  
308 standard care plan, as well as HIV management brochures, and a check-in call from the study  
309 team every three months to remind them to get their VL assessments completed each quarter.  
310 Services may vary based on the needs identified by each patient’s care team, as well as their

311 insurance policy. For example, some patients are assigned HIV case workers, members of the  
312 clinical team that assist patients with medical follow-up, socioeconomic support, and other  
313 outside referrals. INSTACARE CHWs work with the case managers to ensure patients in the  
314 control arm are reminded of their clinic appointments and have support for care continuity.

315

### 316 *Data Management*

317 Physical and electronic data are stored at the INSTACARE Research Office based at the  
318 University of Miami Miller School of Medicine. Electronic data is stored on the University's  
319 Research Electronic Data Capture (REDCap) system, a cloud-based Web app for on- and  
320 offline data capture. This data management system is managed by the University and all data  
321 collected is backed up to institutional servers daily. Staff are provided with University-issued  
322 computers, tablets, and mobile devices equipped with password-protection and University-  
323 issued encryption. Data are reviewed by the data manager on a biweekly basis for missing  
324 values or potential inconsistencies. As needed, these discrepancies are reviewed with the study  
325 team and statistician.

326

### 327 *Sample Size & Statistical Power*

328 Sample size was determined by analyzing the VL suppression data from the pilot study in which  
329 participants enrolled in the intervention achieved a significant VL reduction of  $1.5\log_{10}$   
330 copies/mL versus the usual care arm. Based on this analysis, the proportion of patients  
331 achieving viral suppression in the CHW arm was estimated to be at least twenty percentage  
332 lower than those randomized to the control group. Using an alpha significance level of 0.05,  
333 two-sided t-test analyses estimate that 147 participants per study arm are needed to detect the  
334 minimum difference between groups with 90% power. Thus, a sample size of 300 participants  
335 over the course of the 48-month recruitment period was selected.

336

## 337 **RESULTS**

338 At the time of this writing, 95 BPH have been enrolled into INSTACARE, 42 of whom have been  
339 randomized to the intervention. The first participant was enrolled in July 2023 and enrollment is  
340 projected to end early 2026. A manuscript describing the baseline characteristics of the full  
341 sample is expected to be completed and submitted for publication in 2027.

342

### 343 *Primary Outcome*

344 The primary outcome is a change in viral suppression from baseline to exit at 12-months. Based  
345 on the outcomes of our previous studies, participants admitted to the EUC group are expected  
346 to have low rates of viral suppression, and participants within the intervention arm are estimated  
347 to have least a 20% higher proportion of viral suppression compared to the control arm. With a  
348 sample size of 300 virally unsuppressed BLH randomized 1:1, and an assumption 25% viral  
349 suppression in the control group, this study will have above 91% power to detect at least a 20%  
350 absolute difference between the two study arms.

351

### 352 *Secondary Outcomes*

353 To measure the impact of CHW support, the mode of service delivery (e.g., face-to-face  
354 interactions, phone calls, text messages) and the setting in which services occurred (e.g., clinic,  
355 home, virtual, community setting) are tracked for each patient-CHW interaction. Social support  
356 services provided by the CHWs (e.g., health education, health system navigation, linkage to  
357 social services) were also captured using a detailed log system for CHW field notes.

358 Additionally, as shown in Table 3, several measures were used to capture the influence of  
359 CHWs on socioeconomic and psychosocial outcomes across multiple domains at baseline, 6-  
360 month follow-up, and study exit. The entire survey took approximately 45-60 minutes to

361 complete and examined how the intervention may have improved client outcomes, including

362 health-related social needs, quality of life, and self-efficacy. For these secondary outcomes, test

363 statistic used is the two-sided Z-Test with unpooled variance and .05 significance level; there  
364 will be over 80% power to uncover a standardized difference of .10 between groups.

365

### 366 **Analytic Plan**

367 Using a logistic GEE model, a type III contrast between CHW and UC arms will be estimated in  
368 a model with a binomial distribution and logit link for the primary outcome. The GEE model will  
369 include both 12-month HIV viral suppression status and HIV viral suppression status at 3-month  
370 intervals. Univariate and multivariate models will be used to calculate odds ratios and  
371 corresponding 95% confidence intervals for associations between viral suppression at 12-  
372 months and the two study arms, controlling for covariates such as sociodemographics and  
373 potential confounders. In addition, stratified analysis will be examined for gender, ethnicity, and  
374 immigration status differences. Two-way interaction terms between various study variables and  
375 the study arms may also be included in the models. Standard diagnostic tools will be used to  
376 assess model fit, If needed, alternative analyses may explore others model to account for such  
377 missing data such as last valued carried forward or multiple imputation.

378

### 379 **DISCUSSION**

380 This study is designed to examine the impact of community health workers on HIV viral load  
381 suppression among Black adults with a history of treatment nonadherence in Miami-Dade  
382 County, a high priority area designated for intervention by the U.S. Government's Strategy to  
383 End the HIV Epidemic. Among this initial sample, a substantial proportion face significant  
384 barriers stemming from their social determinants of health. More than half are unhoused or have  
385 unstable housing, and over 75% have a difficult time paying for basics, such as food or rent. By  
386 addressing the underlying socioeconomic barriers this population faces, INSTACARE seeks to  
387 mitigate the social determinants impacting HIV outcomes for PLH. This approach is further  
388 enhanced by the use of Motivational Interviewing. As a strategy principled on meeting people

389 where they are [23], MI is well suited to address the unique barriers impacting ART adherence  
390 among individuals living with HIV [35]. While research on the impact of CHW-led motivational  
391 interviewing is still emerging, preliminary trends among this sample population show promising  
392 results for patients the receive with MI-trained CHW support.

393

#### 394 *Limitations*

395 Participants lost to follow up are a major expected challenge among this patient population and  
396 prior HIV research reports attrition rates between 15% - 35% [36,37]. To limit attrition,  
397 particularly in the comparison group, participants are asked during intake to provide the contact  
398 information for two persons to contact if we are unable to reach them. Updated contact  
399 information is also requested from all participants every three months to maintain open lines of  
400 communication. Missing data is also a pervasive problem in HIV behavioral research, primarily  
401 due to participant drop out [38,39]. During the analytic phase, missing data will be carefully  
402 assessed for potential patterns and analyses will be conducted to determine if there is  
403 differential attrition by treatment arm, and if missingness is related to any of the covariates. If  
404 nonrandom missingness is of concern, a pattern-mixture, propensity score or related models will  
405 be applied so that bias effect can be assessed in sensitivity analyses.

406

407 This study also lacks a model assessing the costs and benefits of CHW HIV programs. While  
408 our prior RCT did not conduct a formal economic analysis, we estimated an annual cost of  
409 nearly \$2,750 per intervention participant. While this intervention does not call for a formal cost  
410 analysis, data on health care utilization and hospitalizations are among the outcomes captured  
411 for this study. If linked to expenditure data, this information could be linked to expenditure data  
412 to develop a formal cost-effectiveness analysis for future studies.

413

#### 414 **Conclusion**



415 Results collected from INSTACARE will provide important information on the effectiveness of a  
416 clinic-based CHW intervention on improved HIV outcomes among diverse Black populations.  
417 The study highlights the innovative role of CHWs play in chronic care delivery, and our findings  
418 will further gauge the feasibility of this framework in the existing health care system.

419

## 420 REFERENCES

- 421 1. The HIV Epidemic in Miami-Dade County in 2022. HIV Surveillance. Florida Department of  
422 Health of Miami Dade. May 16, 2024. Accessed September 5, 2024.  
423 [https://miamidade.floridahealth.gov/programs-and-services/infectious-disease-services/hiv-](https://miamidade.floridahealth.gov/programs-and-services/infectious-disease-services/hiv-aids-services/_documents/7TheHIVEpidemicinMiami2022.pdf)  
424 [aids-services/\\_documents/7TheHIVEpidemicinMiami2022.pdf](https://miamidade.floridahealth.gov/programs-and-services/infectious-disease-services/hiv-aids-services/_documents/7TheHIVEpidemicinMiami2022.pdf).
- 425 2. Florida Department of Health. 2022 Florida Epidemiologic Profiles. Epidemiologic Profile  
426 Reports | Florida Department of Health. November 28, 2023. Accessed September 5, 2024.  
427 [https://www.floridahealth.gov/diseases-and-conditions/aids/surveillance/epi-](https://www.floridahealth.gov/diseases-and-conditions/aids/surveillance/epi-profiles/index.html)  
428 [profiles/index.html](https://www.floridahealth.gov/diseases-and-conditions/aids/surveillance/epi-profiles/index.html).
- 429 3. Centers for Disease Control and Prevention. HIV surveillance supplemental report: Estimated  
430 HIV incidence and prevalence in the United States, 2018–2022. May 21, 2024. Accessed  
431 September 5, 2024. <https://stacks.cdc.gov/view/cdc/156513>.
- 432 4. Dawit R, Trepka MJ, Duncan DT, et al. Neighborhood Factors Associated with Racial/Ethnic  
433 Disparities in Achieving Sustained HIV Viral Suppression Among Miami-Dade County Ryan  
434 White Program Clients. *AIDS Patient Care STDS*. 2021;35(10):401-410.  
435 doi:10.1089/apc.2021.0067
- 436 5. Filippone P, Serrano S, Campos S, et al. Understanding why racial/ethnic inequities along  
437 the HIV care continuum persist in the United States: a qualitative exploration of systemic  
438 barriers from the perspectives of African American/Black and Latino persons living with  
439 HIV. *Int J Equity Health*. 2023;22(1):168. Published 2023 Aug 30. doi:10.1186/s12939-023-  
440 01992-6
- 441 6. Menza TW, Hixson LK, Lipira L, Drach L. Social Determinants of Health and Care Outcomes  
442 Among People With HIV in the United States. *Open Forum Infect Dis*. 2021;8(7):ofab330.  
443 Published 2021 Jun 22. doi:10.1093/ofid/ofab330
- 444 7. Sohail M, Cleveland JD, McCollum CG, et al. Assessing the Impact of Social Determinants  
445 of Health on HIV Care Engagement in the Southern United States: A Cross-Sectional  
446 Study. *J Int Assoc Provid AIDS Care*. 2024;23:23259582241251728.  
447 doi:10.1177/23259582241251728
- 448 8. Rojas D, Melo A, Moise IK, Saavedra J, Szapocznik J. The Association Between the Social  
449 Determinants of Health and HIV Control in Miami-Dade County ZIP Codes, 2017. *J Racial*  
450 *Ethn Health Disparities*. 2021;8(3):763-772. doi:10.1007/s40615-020-00838-z
- 451 9. The Miami-Dade County Homeless Trust. Miami-Dade racial disparity among persons  
452 experiencing homelessness. November 2020. Accessed September 6, 2024.  
453 <https://www.homelesstrust.org/resources-homeless/library/racial-disparity-highlights.pdf>.
- 454 10. Petersen N, Omori M. Unequal Treatment: Racial and Ethnic Disparities in Miami-Dade  
455 Criminal Justice. Miami: ACLU of Florida, 2018.
- 456 11. Burton KL, Ritchwood TD, Metzger IW. Structural Racism and Racial Trauma Among  
457 African Americans at Elevated Risk for HIV Infection. *Am J Public Health*.  
458 2023;113(S2):S102-S106. doi:10.2105/AJPH.2023.307223

- 459 12. Bailey ZD, Krieger N, Agénor M, Graves J, Linos N, Bassett MT. Structural racism and  
460 health inequities in the USA: evidence and interventions. *Lancet*. 2017;389(10077):1453-  
461 1463. doi:10.1016/S0140-6736(17)30569-X
- 462 13. National Academies of Sciences, Engineering, and Medicine; Health and Medicine Division;  
463 Board on Population Health and Public Health Practice; Baciu A, Negussie Y, Geller A, et  
464 al., eds. *Communities in Action: Pathways to Health Equity*. Washington (DC): National  
465 Academies Press (US); January 11, 2017.
- 466 14. Kenya S, Jones J, Arheart K, et al. Using community health workers to improve clinical  
467 outcomes among people living with HIV: a randomized controlled trial. *AIDS Behav*.  
468 2013;17(9):2927-2934. doi:10.1007/s10461-013-0440-1
- 469 15. Young B, Rosenthal A, Escarfuller S, Shah S, Carrasquillo O, Kenya S. Beyond the Barefoot  
470 Doctors: Using Community Health Workers to Translate HIV Research to Service. *AIDS*  
471 *Behav*. 2019;23(10):2879-2888. doi:10.1007/s10461-019-02636-z
- 472 16. Sprague Martinez L, Davoust M, Rajabiun S, et al. "Part of getting to where we are is  
473 because we have been open to change" integrating community health workers on care  
474 teams at ten Ryan White HIV/AIDS program recipient sites. *BMC Public Health*.  
475 2021;21(1):922. Published 2021 May 14. doi:10.1186/s12889-021-10943-1
- 476 17. Morgan AU, Grande DT, Carter T, Long JA, Kangovi S. Penn Center for Community Health  
477 Workers: Step-by-Step Approach to Sustain an Evidence-Based Community Health Worker  
478 Intervention at an Academic Medical Center. *Am J Public Health*. 2016;106(11):1958-1960.  
479 doi:10.2105/AJPH.2016.303366
- 480 18. Richter RW, Bengen B, Alsup PA, Bruun B, Kilcoyne MM, Challenor BD. The community  
481 health worker. A resource for improved health care delivery. *Am J Public Health*.  
482 1974;64(11):1056-1061. doi:10.2105/ajph.64.11.1056
- 483 19. Bastien JW. The making of a community health worker. *World Health Forum*.  
484 1990;11(4):368-372.
- 485 20. Findley S, Matos S, Hicks A, Chang J, Reich D. Community health worker integration into  
486 the health care team accomplishes the triple aim in a patient-centered medical home: a  
487 Bronx tale. *J Ambul Care Manage*. 2014;37(1):82-91. doi:10.1097/JAC.000000000000011
- 488 21. Kangovi S, Asch D. The Community Health Worker Boom. *NEJM Catalyst [Internet]*. 2018.  
489 Available from: <https://catalyst.nejm.org/community-health-workers-boom>.
- 490 22. Mangan J, Del Cid Nunez P, Daou S, et al. Peer and lay health work for people  
491 experiencing homelessness: A scoping review. *PLOS Glob Public Health*.  
492 2024;4(6):e0003332. Published 2024 Jun 24. doi:10.1371/journal.pgph.0003332
- 493 23. Brandford A, Adegboyega A, Combs B, Hatcher J. Training Community Health Workers in  
494 Motivational Interviewing to Promote Cancer Screening. *Health Promot Pract*.  
495 2019;20(2):239-250. doi:10.1177/1524839918761384
- 496 24. Kenya S, Young B, Richards L, et al. Can community health workers in Miami disrupt  
497 disparities among black people living with HIV: A qualitative analysis. *The Open AIDS*  
498 *Journal*. 2024;18(1). doi:10.2174/0118746136309444240425061403
- 499 25. Young B, Carrasquillo O, Weiss DJ, Pan Y, Kenya S. Tailoring HIV Care for Black  
500 Populations (Preprint). *JMIR formative research*. 2024 Mar 1.
- 501 26. Williams RS, Richards VL, Stetten NE, Canidate SS, Algarin A, Fiore A, Cook C, Lucero RJ,  
502 Spencer EC, Cook RL. Applying the social ecological model to explore HIV-related stigma in  
503 Florida: A qualitative study. *Stigma and Health*. 2023 May 11.
- 504 27. U.S. Department of Commerce; 2023. Accessed September 5, 2024.  
505 [https://data.census.gov/table?t=Native%20and%20Foreign-](https://data.census.gov/table?t=Native%20and%20Foreign-Born&g=160XX00US1245000Jul)  
506 [Born&g=160XX00US1245000Jul](https://data.census.gov/table?t=Native%20and%20Foreign-Born&g=160XX00US1245000Jul).
- 507 28. Florida Department of Health; 2022. Accessed September 6, 2024.  
508 <https://www.flhealthcharts.gov/ChartsDashboards/rdPage.aspx?rdReport=Death.Dataviewer>  
509 [&cid=0122](https://www.flhealthcharts.gov/ChartsDashboards/rdPage.aspx?rdReport=Death.Dataviewer).

- 510 29. Rodriguez, A., Botero, V. Jackson Memorial Clinic Demographics. Email Communication,  
511 February 2024.
- 512 30. FDOH HIV/AIDS 501 HIV Prevention Counseling, Testing and Linkage-Introduction.  
513 Train.org. May 2021. Accessed September 6, 2024.  
514 <https://www.train.org/florida/course/1058541/compilation>.
- 515 31. Portillo EM, Vasquez D, Brown LD. Promoting Hispanic Immigrant Health via Community  
516 Health Workers and Motivational Interviewing. *Int Q Community Health Educ*. 2020;41(1):3-  
517 6. doi:10.1177/0272684X19896731
- 518 32. Moyers TB, Rowell LN, Manuel JK, Ernst D, Houck JM. The Motivational Interviewing  
519 Treatment Integrity Code (MITI 4): Rationale, Preliminary Reliability and Validity. *J Subst*  
520 *Abuse Treat*. 2016;65:36-42. doi:10.1016/j.jsat.2016.01.001
- 521 33. Schwenker R, Dietrich CE, Hirpa S, et al. Motivational interviewing for substance use  
522 reduction. *Cochrane Database Syst Rev*. 2023;12(12):CD008063. Published 2023 Dec 12.  
523 doi:10.1002/14651858.CD008063.pub3
- 524 34. Kenya S, Jones J, Arheart K, et al. Using community health workers to improve clinical  
525 outcomes among people living with HIV: a randomized controlled trial. *AIDS Behav*.  
526 2013;17(9):2927-2934. doi:10.1007/s10461-013-0440-1
- 527 35. Vitsupakorn S, Pierce N, Ritchwood TD. Cultural interventions addressing disparities in the  
528 HIV prevention and treatment cascade among Black/African Americans: a scoping  
529 review. *BMC Public Health*. 2023;23(1):1748. Published 2023 Sep 7. doi:10.1186/s12889-  
530 023-16658-9
- 531 36. Leno NN, Guilavogui F, Camara A, Kadio KJO, Guilavogui T, Diallo TS, Diallo MA, Leno  
532 DWA, Ricarte B, Koita Y, Kaba L, Ahiatsi A, Touré N, Traoré P, Chaloub S, Kamano A,  
533 Vicente CA, Delamou A, Cissé M. Retention and Predictors of Attrition Among People Living  
534 With HIV on Antiretroviral Therapy in Guinea: A 13-Year Historical Cohort Study in Nine  
535 Large-Volume Sites. *Int J Public Health*. 2023 Jul 13;68:1605929. doi:  
536 10.3389/ijph.2023.1605929. PMID: 37519433; PMCID: PMC10372218.
- 537 37. Dareng EO, Olaniyan Y, Adebamowo SN, Eseyin OR, Odutola MK, Obiefuna EM, Offiong  
538 RA, Pharoah PP, Adebamowo CA. Age, HIV status, and research context determined  
539 attrition in a longitudinal cohort in Nigeria. *J Clin Epidemiol*. 2018 Aug;100:32-43. doi:  
540 10.1016/j.jclinepi.2018.04.012. Epub 2018 Apr 19. PMID: 29679747; PMCID: PMC8015251.
- 541 38. Mendez KJW, Cudjoe J, Strohmayer S, Han HR. Recruitment and Retention of Women  
542 Living With HIV for Clinical Research: A Review. *AIDS Behav*. 2021;25(10):3267-3278.  
543 doi:10.1007/s10461-021-03273-1
- 544 39. Tross S, Pinho V, Lima JE, et al. Participation in HIV Behavioral Research: Unanticipated  
545 Benefits and Burdens. *AIDS Behav*. 2018;22(7):2258-2266. doi:10.1007/s10461-018-2114-5  
546

## 547 SUPPORTING INFORMATION

548  
549 S1 FIG. SPIRIT FIGURE

550  
551 S2 TABLE. SPIRIT CHECKLIST

552  
553 S1 FILE. INSTACARE PROTOCOL

554  
555 **Trial registration:** ClinicalTrials.gov NCT04663152

556  
557 Short title: Improving HIV outcomes in Miami's Black populations with clinic-based community  
558 health workers

**INSTACARE SPIRIT 2013 Figure**

|                                                    | <b>STUDY PERIOD</b> |                   |                                                              |                  |
|----------------------------------------------------|---------------------|-------------------|--------------------------------------------------------------|------------------|
|                                                    | <b>Enrollment</b>   | <b>Allocation</b> | <b>Post-allocation (Follow-up)</b>                           | <b>Close-out</b> |
| <b>Timepoint</b>                                   | Month 0             | Month 0           | Months 1-12                                                  | Month 12         |
| <b>Enrollment</b>                                  |                     |                   |                                                              |                  |
| Informed Consent                                   | X                   |                   |                                                              |                  |
| Baseline Assessment                                |                     | X                 |                                                              |                  |
| <b>Intervention</b>                                |                     |                   |                                                              |                  |
| Randomization                                      |                     | X                 |                                                              |                  |
| CHW Intervention                                   |                     |                   | X (up to 12 months)                                          |                  |
| Usual Care                                         |                     |                   | X                                                            |                  |
| <b>Assessments</b>                                 |                     |                   |                                                              |                  |
| Viral Load Testing (Primary Outcome)               |                     |                   | X (every 3 months)                                           | X                |
| ART Adherence (ACTG Adherence Questionnaire)       |                     | X                 | X (6 months, 12 months)                                      | X                |
| Non-HIV Medical Care (Medical Records)             |                     |                   | X (continuous)                                               |                  |
| Hospitalizations (Medical Records)                 |                     |                   | X (continuous)                                               |                  |
| Health-Related Social Needs (HRSN)                 |                     | X                 | X (6 months, 12 months)                                      | X                |
| Racism Index (IRRS-B)                              |                     | X                 | X (6 months, 12 months)                                      | X                |
| Food Security (HFIAS)                              |                     | X                 | X (6 months, 12 months)                                      | X                |
| Doctor-Patient Interaction                         |                     | X                 | X (6 months, 12 months)                                      | X                |
| Clinic HIV Stigma (Perceived Discrimination Scale) |                     | X                 | X (6 months, 12 months)                                      | X                |
| Community HIV Stigma (Short Version Scale)         |                     | X                 | X (6 months, 12 months)                                      | X                |
| Social Support Assessment                          |                     | X                 | X (6 months, 12 months)                                      | X                |
| Quality of Life (MOS-HIV Survey)                   |                     | X                 | X (6 months, 12 months)                                      | X                |
| Self-Efficacy (HIV-ASES)                           |                     | X                 | X (6 months, 12 months)                                      | X                |
| Empowerment (Health Empowerment Inventory)         |                     | X                 | X (6 months, 12 months)                                      | X                |
| Adverse Event Monitoring                           |                     |                   | Continuous                                                   |                  |
| Participant Compensation                           |                     |                   | \$125 (enrollment, exit); \$50 (3-, 6-, 9-month assessments) |                  |
